# Supplementary material
Source: publisher site journal article supplement (https://www.dovepress.com/article/393620)
Supplement: Supplementary file 1 [file get_supplementary_file.php]

**Supplementary description**

**Supplementary figure 1:** The first gene module was established from hub DEGs.

**
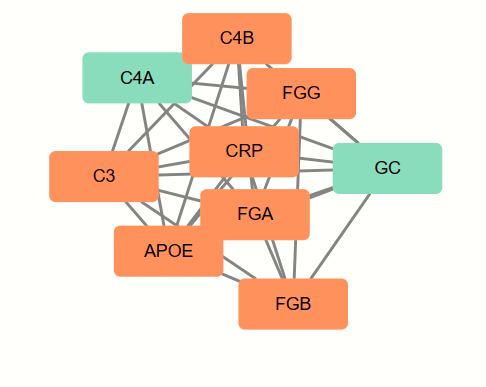
**

**Supplementary figure 2:** The second gene module was established from hub DEGs.

**
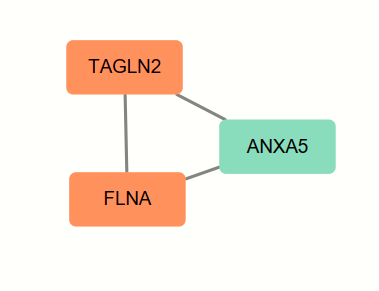
**

**Supplementary figure 3:** The third gene module was established from hub DEGs.

**
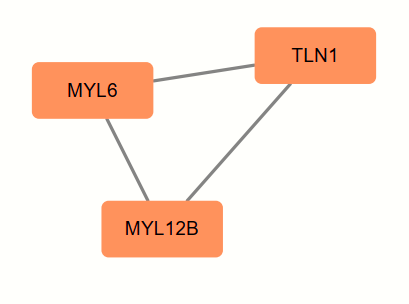
**

**Supplementary table 1:** Inducement of ES (Part A:ES preceded by inflammatory diseases, Part B: ES triggered by organ transplant/anti-epileptic drugs,)

|  | Age, year/sex | Anatomic site of involvement | inducement | Reported Time |
| --- | --- | --- | --- | --- |
| Part A | 29/F | bilateral nipple(eruptive) | may induced by the inflammatory process caused by a factor or factors that triggered vitiligo | 2017 |
| 26/F | face（eruptive, symmetrical） | the development of lesions was preceded by dermatitis | 2012 |
| 50/F | forearm（bilateral, symmetrical） | papular pruritic eruption against a background of hyperkeratotic eczema. | 2011 |
| 31/M | pubic area (eruptive) | may induced by depilatio**n** with a subsequently reactive inflammatory process resulting in a hyperplastic reaction of the eccrine ducts | 2008 |
| 45/F | the irradiated breast area(eruptive) | may induced by radiation, a potent inducer of acute inflammation and dermal fibrosis | 2006 |
| 27/M | wrist（presented with the contour of the wristwatch） | the syringomatous process was a sequel of a contact dermatitis | 2003 |
| 68/M | chin | syringomatous changes of eccrine sweat ducts associated with prurigo nodularis | 1998 |
| 27/M | Abdomen, buttocks, thighs | mast cell：the syringomas occurring on urticaria pigmentosa lesions | 1988 |
| Part B | 70/ F | trunk and upper limbs | soon after a liver transplant | 2018 |
| 51/M | groin（asymptomatic, eruptive） | 3 years after a kidney transplant | 2014 |
| 69/M | Abdomen, chest, thighs（Eruptive ） | valproic acid and carbamazepine | 2012 |
| 34/F | Trunk, neck | anti-epileptics | 2010 |

**Note:** ES, eruptive syringoma; F, female; M, male.

**Supplementary table 2:** The evidences that ES and inflammation are related. (Part A: pathology or symptom of ES, Part B: ES healed by topical adelmidrol, ES: eruptive syringoma)

|  | Age, year/sex | Anatomic site of involvement | relationship with inflammation | Reported Time |
| --- | --- | --- | --- | --- |
| Part A | 44/ F | labia majora(eruptive) | prominent lymphocytic inflammation composed of CD4+ and CD8+ T cells | 2009 |
| 26/F | vulva（a 5-year history of persistent, intermittently itchy eruptions） | a marked increase of mast cells in the interstitial connective tissue was shown | 2005 |
| 24/ F | vulva（multiple、bilateral） | accompany with pruritus | 2004 |
| 41/M | abdomen、arms、thighs | a lymphocytic infiltrate involving the upper portion of the eccrine duct | 2003 |
| Part B | 36/ F | vulva（giant、multiple、bilateral ） | the downregulation of mast cell activation by adelmidrol may have contributed to the remission of the syringomas（topical application） | 2018 |

**Note:** ES, eruptive syringoma; F, female; M, male.
